# Supplementary material for: Exploring American Elderberry Compounds for Antioxidant, Antiviral, and Antibacterial Properties Through High-Throughput Screening Assays Combined with Untargeted Metabolomics
Source: PubMed Central journal article supplement — bioRxiv. 2024 Sep 14:2024.09.13.611920. Preprint. [Version 1] doi: 10.1101/2024.09.13.611920 (PMC11419141; doi:10.1101/2024.09.13.611920), 2024-09-14
Supplement: media-1.pdf [file media-1.pdf]

## Supplementary information

Supplementary Table 1. The annotation of peaks isolated from American Elderberry juices

| Compounds                                      | Formula  | Adducts             | Theoretical Mass | Observed Mass | $\Delta m$ (ppm) | Activities                                                  | Ref   |
|------------------------------------------------|----------|---------------------|------------------|---------------|------------------|-------------------------------------------------------------|-------|
| 3-4, Dihydroxybenzoic acid                     | C7H6O4   | [M-H] <sup>-</sup>  | 154.02661        | 154.027       | 1.5              | Antioxidant, anti-inflammatory                              | 1     |
| 3-Furoic acid                                  | C5H4O3   | [M-H] <sup>-</sup>  | 112.01605        | 112.017       | 4.3              | Allosteric modulator                                        | 2     |
| 3-hydroxycoumarin                              | C9H6O3   | [M+H] <sup>+</sup>  | 162.03169        | 162.031       | -2.9             | Anticancer, anti-inflammatory, antimicrobial                | 3-5   |
| 4-caffeoylquinic acid (cryptochlorogenic acid) | C16H18O9 | [M+H] <sup>+</sup>  | 354.09508        | 354.095       | 1.2              | Anti-inflammatory, antioxidant, antidiabetic                | 6,7   |
| 4-hydroxybenzaldehyde                          | C7H6O2   | [M+H] <sup>+</sup>  | 122.03678        | 122.036       | -5.0             | Antioxidant, wound healing, vasculoprotective agent         | 8,9   |
| 5,7-Dihydroxychromone                          | C9H6O4   | [M+H] <sup>+</sup>  | 178.02661        | 178.026       | -2.4             | Antioxidant, antidiabetic, anticancer                       | 10-12 |
| 7,8-Dihydroxycoumarin (Daphnetin)              | C9H6O4   | [M+H] <sup>+</sup>  | 178.02661        | 178.026       | -2.4             | Neuroprotective, antioxidant, anti-inflammatory, anticancer | 13,14 |
| Allamandin                                     | C15H16O7 | [M+H] <sup>+</sup>  | 308.0896         | 308.089       | -1.3             | Antiviral, anticancer                                       | 15-17 |
| Anethole                                       | C10H12O  | [M+H] <sup>+</sup>  | 148.08882        | 148.088       | -3.6             | Antimicrobial, antioxidant, anti-inflammatory               | 18,19 |
| Aurentiacin                                    | C18H18O4 | [M+H] <sup>+</sup>  | 298.12051        | 298.12        | -1.0             | Anti-inflammatory, antimicrobial                            | 20,21 |
| Betaine                                        | C5H11NO2 | [M+H] <sup>+</sup>  | 117.07898        | 117.078       | -4.3             | Antioxidant, anti-inflammatory                              | 22,23 |
| Burseran                                       | C22H26O6 | [M+Na] <sup>+</sup> | 386.17294        | 386.173       | -0.2             | Anti-inflammatory, anticancer                               | 24-27 |

|                                          |                                                  |                    |           |         |      |                                                                              |       |
|------------------------------------------|--------------------------------------------------|--------------------|-----------|---------|------|------------------------------------------------------------------------------|-------|
| Caffeic acid                             | C <sub>9</sub> H <sub>8</sub> O <sub>4</sub>     | [M-H] <sup>-</sup> | 180.04226 | 180.043 | 2.0  | Antioxidant                                                                  | 28    |
| Castanospermine                          | C <sub>8</sub> H <sub>15</sub> N <sub>4</sub> O  | [M+H] <sup>+</sup> | 189.10011 | 189.1   | -2.3 | Antivirus, anticancer                                                        | 29,30 |
| Catechin                                 | C <sub>15</sub> H <sub>14</sub> O <sub>6</sub>   | [M-H] <sup>-</sup> | 290.07904 | 290.079 | 0.2  | Antioxidant, anticancer, cardiovascularprotective potency                    | 31,32 |
| Cearoin                                  | C <sub>14</sub> H <sub>12</sub> O <sub>4</sub>   | [M+H] <sup>+</sup> | 244.07356 | 244.073 | -0.9 | Anticancer, anti-inflammatory, antimicrobial                                 | 33–35 |
| Chlorogenic acid (5-caffeoylquinic acid) | C <sub>16</sub> H <sub>18</sub> O <sub>9</sub>   | [M+H] <sup>+</sup> | 354.09508 | 354.095 | 1.2  | Antimicrobial, antidiabetic, antioxidant, anti-obesity, antihypertension     | 36,37 |
| Chromone                                 | C <sub>9</sub> H <sub>6</sub> O <sub>2</sub>     | [M+H] <sup>+</sup> | 146.03678 | 146.036 | -3.1 | Antiallergic, anti-inflammatory, antidiabetic, anticancer, and antimicrobial | 38,39 |
| Cinnamaldehyde                           | C <sub>9</sub> H <sub>8</sub> O                  | [M+H] <sup>+</sup> | 132.05751 | 132.057 | -3.8 | Antimicrobial, antidiabetic, antioxidant                                     | 40,41 |
| Citric acid                              | C <sub>6</sub> H <sub>8</sub> O <sub>7</sub>     | [M-H] <sup>-</sup> | 192.027   | 192.027 | 0.6  | Antioxidant, anti-inflammation                                               | 42,43 |
| Cotinine                                 | C <sub>10</sub> H <sub>12</sub> N <sub>2</sub> O | [M+H] <sup>+</sup> | 176.09496 | 176.094 | -4.9 | Neuroprotective                                                              | 44    |
| Coumarin                                 | C <sub>9</sub> H <sub>6</sub> O <sub>2</sub>     | [M+H] <sup>+</sup> | 146.03678 | 146.036 | -3.1 | Anticancer, anti-inflammatory, antimicrobial                                 | 3,4   |
| Cuminaldehyde                            | C <sub>10</sub> H <sub>12</sub> O                | [M+H] <sup>+</sup> | 148.08882 | 148.088 | -3.6 | Antimicrobial, antioxidant, anticancer                                       | 45,46 |
| Cyanidin 3-O-galactoside                 | C <sub>21</sub> H <sub>21</sub> O <sub>11</sub>  | [M+] <sup>+</sup>  | 449.10839 | 449.108 | 1.4  | Antioxidant, anti-inflammatory, anticancer                                   | 47    |
| Cyanidin 3-O-glucoside                   | C <sub>21</sub> H <sub>21</sub> O <sub>11</sub>  | [M+H] <sup>+</sup> | 449.10839 | 449.109 | 2.1  | Antioxidant, anti-inflammatory                                               | 48–50 |

|                                        |           |                      |           |         |      |                                                                                         |       |
|----------------------------------------|-----------|----------------------|-----------|---------|------|-----------------------------------------------------------------------------------------|-------|
| Cyanidin 3-O-rutinoside                | C27H31O15 | [M+] <sup>+</sup>    | 595.1663  | 595.166 | 0.0  | Antioxidant, anti-inflammatory                                                          | 48,50 |
| Cyanidin 3-O-sambubioside              | C26H29O15 | [M+] <sup>+</sup>    | 581.15065 | 581.15  | 1.9  | Anticancer, antihypertension, antioxidant, antimicrobial                                | 51,52 |
| Cyanidin 3-O-sophoroside               | C27H31O16 | [M+] <sup>+</sup>    | 611.16121 | 611.161 | 0.2  | Anticancer, antioxidant                                                                 | 53,54 |
| Cyanidin 3,5-O-diglucoside             | C27H31O16 | [M+] <sup>+</sup>    | 611.16121 | 611.161 | 0.2  | Antioxidant, anti-inflammatory, skin hydration effect                                   | 55,56 |
| Dehydrozingerone                       | C11H12O3  | [M+H] <sup>+</sup>   | 192.07864 | 192.078 | -3.7 | Antioxidant, anti-inflammatory, antidepressant, antimicrobial, antidiabetic, anticancer | 57-60 |
| Delphinidin 3-O-rutinoside (tulipanin) | C27H31O16 | [M+H] <sup>+</sup>   | 611.16121 | 611.16  | 1.2  | Antioxidant, anticancer                                                                 | 61,62 |
| Dimethadione                           | C5H7NO3   | [M+NH4] <sup>+</sup> | 129.04259 | 129.042 | -2.4 | Antiepileptic                                                                           | 63    |
| Epiarfaelechin trimethyl ether         | C18H20O5  | [M+H] <sup>+</sup>   | 316.13107 | 316.131 | -0.8 | Anticancer                                                                              | 64    |
| Epicatechin                            | C15H14O6  | [M-H] <sup>-</sup>   | 290.07904 | 290.079 | 1.3  | Antioxidant, anti-inflammatory, neuroprotective agent                                   | 65-67 |
| Estragole                              | C10H12O   | [M+H] <sup>+</sup>   | 148.08882 | 148.088 | -3.6 | Antioxidant, anticancer                                                                 | 68    |
| Ethyl p-coumarate                      | C11H12O3  | [M+H] <sup>+</sup>   | 192.07864 | 192.078 | -3.7 | Antifungal, antioxidant                                                                 | 69,70 |
| Ferulic acid                           | C10H10O4  | [M+H] <sup>+</sup>   | 194.05791 | 194.057 | 4.3  | Antioxidant, anti-inflammatory, anticancer, antimicrobial                               | 71,72 |
| Gallic acid                            | C7H6O5    | [M+NH4] <sup>+</sup> | 170.02152 | 170.021 | 2.1  | Antioxidant, anti-inflammatory, anticancer, antimicrobial, antiviral                    | 73    |

|                                       |            |                      |           |         |         |                                                                                                |       |
|---------------------------------------|------------|----------------------|-----------|---------|---------|------------------------------------------------------------------------------------------------|-------|
| Gastrodin                             | C13H18O7   | [M+Na] <sup>+</sup>  | 286.10525 | 286.105 | -0.6    | Neuroprotective, antidiabetic, anti-inflammatory                                               | 74,75 |
| Herniarin                             | C10H8O3    | [M+H] <sup>+</sup>   | 176.04734 | 176.047 | -2.7    | Anticancer, anti-inflammatory, neuroprotective                                                 | 76,76 |
| Hymechrome                            | C10H8O3    | [M+H] <sup>+</sup>   | 176.04734 | 176.047 | -2.7    | Anticancer                                                                                     | 77    |
| Hyperoside (Quercetin 3-galactoside)  | C21H20O12  | [M-H] <sup>-</sup>   | 464.09548 | 464.096 | 0.5     | Anticancer, anti-inflammatory, antibacterial, antiviral, antidepressant                        | 78    |
| Indoleacrylic acid                    | C11H9NO2   | [M+H] <sup>+</sup>   | 187.06333 | 187.063 | -2.4    | Anti-inflammatory                                                                              | 79    |
| Isohopeaphenol                        | C56H42O12  | [M+K] <sup>+</sup>   | 906.26763 | 905.265 | -1106.6 | Antioxidant, antimicrobial, antiviral                                                          | 80-82 |
| Isorhamnetin                          | C16H12O7   | [M+H] <sup>+</sup>   | 316.0583  | 316.058 | 0.9     | Anticancer, antioxidant                                                                        | 83,84 |
| Isorhamnetin 3-rutinoside (Narcissin) | C28H32O16  | [M-H] <sup>-</sup>   | 624.16903 | 624.169 | 0.2     | Antiviral, antioxidant, antimicrobial, anticancer                                              | 85-87 |
| Isorhamnetin-3-glucoside              | C22H22O12  | [M-H] <sup>-</sup>   | 478.11113 | 478.111 | 0.5     | Anti-inflammatory                                                                              | 88    |
| Kaempferol                            | C15H10O6   | [M-H] <sup>-</sup>   | 286.04774 | 286.048 | 1.2     | Antimicrobial, antioxidant                                                                     | 89,90 |
| Kaempferol 3-glucoside (astragalín)   | C21H20O11  | [M-H] <sup>-</sup>   | 448.10056 | 448.101 | 1.5     | Anti-inflammatory, antioxidant, antidiabetic, anticancer, cardioprotective agent, cosmetic use | 91    |
| Kaempferol 3-O-rutinoside             | C27H30O15  | [M+H] <sup>+</sup>   | 594.15847 | 594.158 | 0.2     | Antioxidant                                                                                    | 92,93 |
| Kinetin riboside                      | C15H17N5O5 | [M+NH4] <sup>+</sup> | 347.12296 | 347.122 | -3.4    | Anticancer                                                                                     | 94,95 |
| Kuwanon L                             | C35H30O11  | [M+H] <sup>+</sup>   | 626.17881 | 626.175 | -6.0    | Antiviral, anti-inflammatory, antimicrobial                                                    | 96-98 |

|                                             |                                                                               |                                   |           |         |         |                                                                                                              |         |
|---------------------------------------------|-------------------------------------------------------------------------------|-----------------------------------|-----------|---------|---------|--------------------------------------------------------------------------------------------------------------|---------|
| L-tyrosine                                  | C <sub>9</sub> H <sub>11</sub> NO <sub>3</sub>                                | [M+H] <sup>+</sup>                | 181.07389 | 181.074 | -1.9    | Antidepressant, antioxidant                                                                                  | 99,100  |
| L-Valine                                    | C <sub>5</sub> H <sub>11</sub> NO <sub>2</sub>                                | [M+H] <sup>+</sup>                | 117.07898 | 117.078 | -4.3    | Amino acid                                                                                                   | 101     |
| Lucenin 2                                   | C <sub>27</sub> H <sub>30</sub> O <sub>16</sub>                               | [M+H] <sup>+</sup>                | 610.15338 | 610.154 | 0.3     | Anti-inflammatory, antioxidant                                                                               | 102     |
| Luteolin                                    | C <sub>15</sub> H <sub>10</sub> O <sub>6</sub>                                | [M-H] <sup>-</sup>                | 286.04774 | 286.048 | 1.2     | Anticancer, antiviral                                                                                        | 103–106 |
| Monocerin                                   | C <sub>16</sub> H <sub>20</sub> O <sub>6</sub>                                | [M+H] <sup>+</sup>                | 308.12599 | 308.125 | -3.3    | Antimicrobial                                                                                                | 107     |
| Moroctic acid (stearidonic acid)            | C <sub>18</sub> H <sub>28</sub> O <sub>2</sub>                                | [M+NH <sub>4</sub> ] <sup>+</sup> | 276.20892 | 276.209 | -0.5    | Anti-inflammatory, anticancer, anti-acne                                                                     | 108–110 |
| Myricetin (Myricitin)                       | C <sub>15</sub> H <sub>10</sub> O <sub>8</sub>                                | [M-H] <sup>-</sup>                | 318.03757 | 318.038 | 2.0     | Anticancer, anti-inflammatory, antidiabetic, cardio-cerebrovascular protection agent, anti-neurodegenerative | 111     |
| Myristicin                                  | C <sub>11</sub> H <sub>12</sub> O <sub>3</sub>                                | [M+H] <sup>+</sup>                | 192.07864 | 192.078 | -3.7    | Anticancer, antimicrobial, anti-inflammatory, antioxidant                                                    | 112–114 |
| Naringenin                                  | C <sub>15</sub> H <sub>12</sub> O <sub>5</sub>                                | [M-H] <sup>-</sup>                | 272.06847 | 272.069 | 2.3     | Anticancer, antioxidant, anti-inflammatory, antidiabetic, neuroprotective agent                              | 115,116 |
| Neochlorogenic acid (3-caffeoylquinic acid) | C <sub>16</sub> H <sub>18</sub> O <sub>9</sub>                                | [M+H] <sup>+</sup>                | 354.09508 | 354.095 | 0.5     | Antioxidant, antifungal, anti-inflammatory and anticarcinogenic effects                                      | 117,118 |
| Niacin (Vit B3)                             | C <sub>6</sub> H <sub>5</sub> NO <sub>2</sub>                                 | [M+H] <sup>+</sup>                | 123.03203 | 123.032 | -3.9    | Anti-dyslipidemic, anti-inflammatory                                                                         | 119,120 |
| Niacinamide                                 | C <sub>6</sub> H <sub>6</sub> N <sub>2</sub> O                                | [M+H] <sup>+</sup>                | 122.04801 | 122.048 | -3.2    | Anti-acne, antiaging and skin improvement effect                                                             | 121,122 |
| Nutlin-3                                    | C <sub>30</sub> H <sub>30</sub> Cl <sub>2</sub> N <sub>4</sub> O <sub>4</sub> | [M+K] <sup>+</sup>                | 580.16441 | 579.165 | -1723.1 | Anticancer                                                                                                   | 123,124 |

|                                          |                                                   |                     |           |         |         |                                                                                   |                |
|------------------------------------------|---------------------------------------------------|---------------------|-----------|---------|---------|-----------------------------------------------------------------------------------|----------------|
| p-Coumaric acid                          | C <sub>9</sub> H <sub>8</sub> O <sub>3</sub>      | [M-H] <sup>-</sup>  | 164.04734 | 164.048 | 3.0     | Antimicrobial, antioxidant, anticancer                                            | 125–127        |
| p-Cymene                                 | C <sub>10</sub> H <sub>14</sub>                   | [M+H] <sup>+</sup>  | 134.10955 | 134.109 | -2.7    | Antioxidant, anti-inflammatory, anticancer, antimicrobial                         | 128–131        |
| Palmitoyl glycine                        | C <sub>18</sub> H <sub>35</sub> NO <sub>3</sub>   | [M+Na] <sup>+</sup> | 313.26169 | 313.262 | -0.5    | Anti-inflammatory                                                                 | 132            |
| Pelargonidin 3-O-glucoside               | C <sub>21</sub> H <sub>21</sub> O <sub>10</sub>   | [M+] <sup>+</sup>   | 433.11347 | 433.113 | 0.7     | Anti-inflammatory, antioxidant                                                    | 133–135        |
| Peonidin 3-O-glucoside                   | C <sub>22</sub> H <sub>23</sub> ClO <sub>11</sub> | [M+H] <sup>+</sup>  | 498.09289 | 498.094 | 1.6     | Anti-inflammatory, antioxidant, anticancer                                        | 136,137        |
| Picolinic acid                           | C <sub>6</sub> H <sub>5</sub> NO <sub>2</sub>     | [M+H] <sup>+</sup>  | 123.03203 | 123.032 | -3.9    | Anticancer, antiviral                                                             | 138–140        |
| Pyroglutamic acid                        | C <sub>5</sub> H <sub>7</sub> NO <sub>3</sub>     | [M+H] <sup>+</sup>  | 129.04259 | 129.042 | -3.1    | Antimicrobial, anti-inflammatory, neurogenic activities                           | 141,142        |
| Quercetin                                | C <sub>15</sub> H <sub>10</sub> O <sub>7</sub>    | [M-H] <sup>-</sup>  | 302.04265 | 302.043 | 0.9     | Antioxidant, anti-inflammatory, anticancer                                        | 43,143–145     |
| Quercetin-3-b-D-glucoside (isoquercetin) | C <sub>21</sub> H <sub>20</sub> O <sub>12</sub>   | [M-H] <sup>-</sup>  | 464.09548 | 464.096 | 0.9     | Antioxidant, anti-inflammatory, neuroprotective                                   | 146–148        |
| r-Viniferin                              | C <sub>56</sub> H <sub>42</sub> O <sub>12</sub>   | [M+K] <sup>+</sup>  | 906.26763 | 905.265 | -1106.6 | Antioxidant, anti-inflammatory, antimicrobial, anticancer                         | 149–151        |
| Rutin                                    | C <sub>27</sub> H <sub>30</sub> O <sub>17</sub>   | [M-H] <sup>-</sup>  | 610.15338 | 610.153 | 0.1     | Anticancer, antioxidant, anti-inflammatory                                        | 43,146,152,153 |
| Salicin                                  | C <sub>13</sub> H <sub>18</sub> O <sub>7</sub>    | [M+Na] <sup>+</sup> | 286.10525 | 286.105 | -0.6    | Anticancer, antioxidant                                                           | 154–156        |
| Salicylaldehyde                          | C <sub>7</sub> H <sub>6</sub> O <sub>2</sub>      | [M+H] <sup>+</sup>  | 122.03678 | 122.036 | -5.0    | Antimicrobial                                                                     | 157            |
| Salidroside                              | C <sub>14</sub> H <sub>20</sub> O <sub>7</sub>    | [M+Na] <sup>+</sup> | 300.1209  | 300.12  | -1.5    | Anticancer, anti-inflammation, antioxidant, antiviral, antiaging, neuroprotective | 158–160        |

|               |                                                 |                    |           |         |         |                                                                                        |            |
|---------------|-------------------------------------------------|--------------------|-----------|---------|---------|----------------------------------------------------------------------------------------|------------|
| Spermine      | C <sub>10</sub> H <sub>26</sub> N <sub>4</sub>  | [M+H] <sup>+</sup> | 202.21575 | 202.215 | -2.6    | Antioxidant, anticancer, antiaging                                                     | 29,161,162 |
| Tamarixetin   | C <sub>16</sub> H <sub>12</sub> O <sub>7</sub>  | [M+H] <sup>+</sup> | 316.0583  | 316.058 | -0.9    | Anticancer, anti-inflammatory, anti-oxidation, organ protection, prevention of obesity | 163–165    |
| Tropolone     | C <sub>7</sub> H <sub>6</sub> O <sub>2</sub>    | [M+H] <sup>+</sup> | 122.03678 | 122.036 | -5.0    | Anticancer, antimicrobial                                                              | 166,167    |
| Vanilloloside | C <sub>14</sub> H <sub>20</sub> O <sub>8</sub>  | [M-H] <sup>-</sup> | 316.11582 | 316.116 | 0.3     | Antimicrobial, antioxidant, anticancer                                                 | 168–170    |
| Vitisin C     | C <sub>56</sub> H <sub>42</sub> O <sub>12</sub> | [M+K] <sup>+</sup> | 906.26763 | 905.265 | -1106.6 | Neuroprotective, antioxidant                                                           | 148,171    |

Procedures employed for the identification or putative identification<sup>172</sup> are comparisons with MS spectral data or accurate mass in the METLIN library.

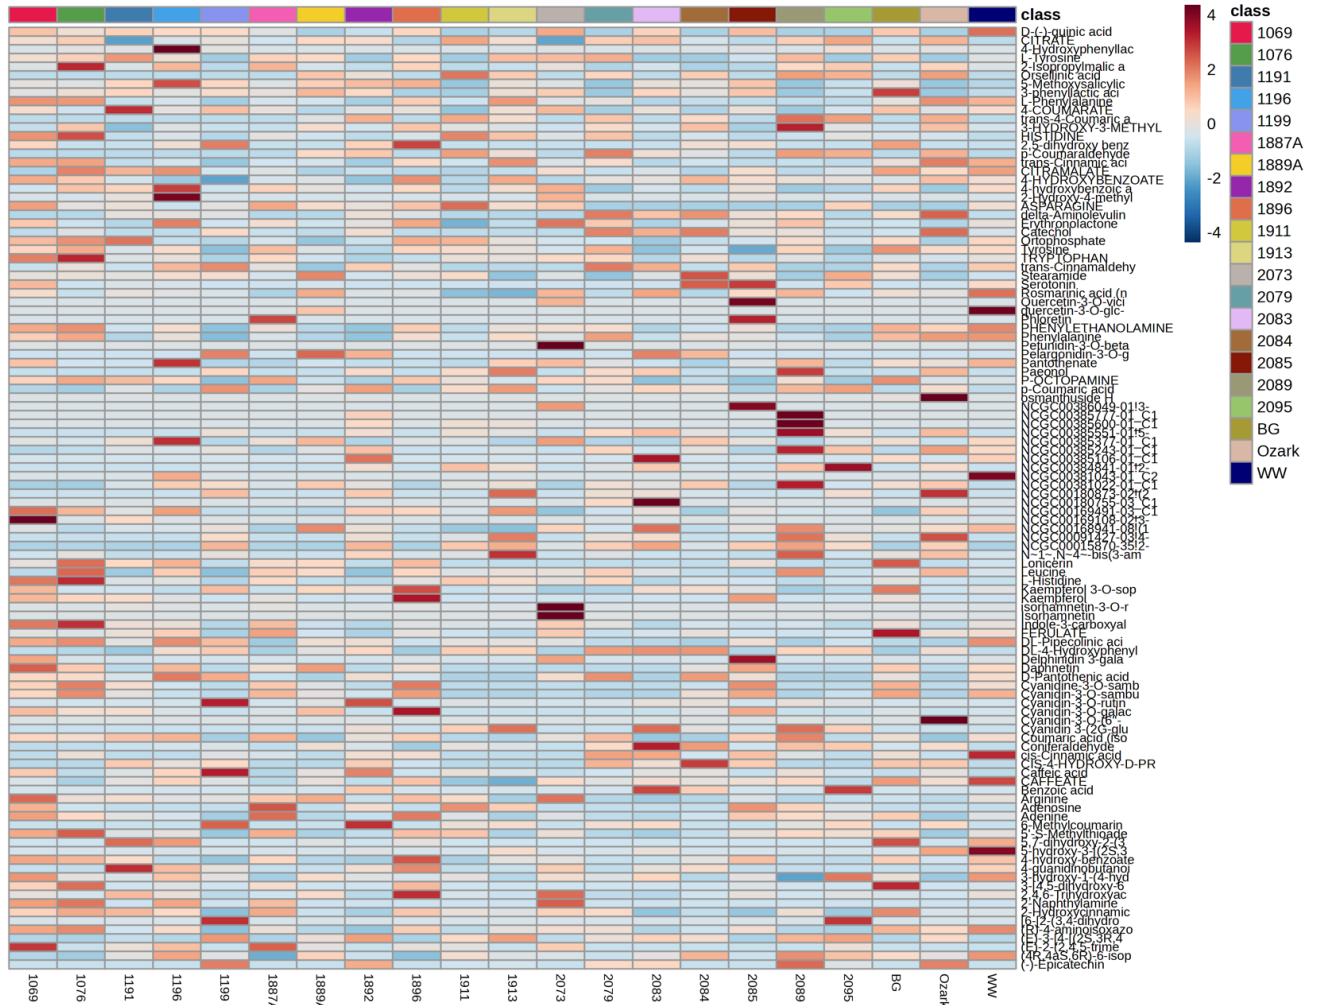

Supplementary Figure 1. The heatmap relative intensity of 108 putatively identified compounds in the juices of 21 American elderberry genotypes.



Supplementary Table 2. K-means clustering result.

| Cluster   | Members                                                                                                                                                                                                                                                                                                 |
|-----------|---------------------------------------------------------------------------------------------------------------------------------------------------------------------------------------------------------------------------------------------------------------------------------------------------------|
| Cluster 1 | 1191, 1191.1, 1191.2, 1196, 1196.1, 1196.2, 1199, 1199.1, 1199.2, 1889A, 1889A.1, 1889A.2, 1892, 1892.1, 1892.2, 1911, 1911.1, 1911.2, 1913, 1913.1, 1913.2, 2073, 2073.1, 2073.2, 2079, 2079.1, 2079.2, 2083, 2083.1, 2083.2, 2084, 2084.1, 2084.2, 2085.1, 2089, 2089.1, 2089.2, 2095, 2095.1, 2095.2 |
| Cluster 2 | Ozark, Ozark.1, Ozark.2                                                                                                                                                                                                                                                                                 |
| Cluster 3 | 1069, 1069.1, 1069.2, 1076, 1076.1, 1076.2, 1887A, 1887A.1, 1887A.2, 1896, 1896.1, 1896.2, 2085, 2085.2, BG, BG.1, BG.2, WW, WW.1, WW.2                                                                                                                                                                 |

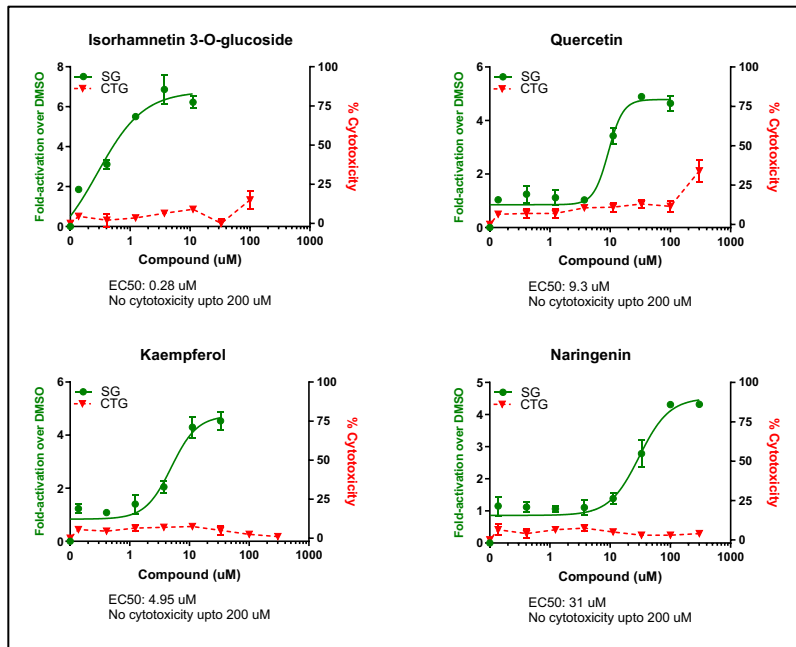

Supplementary Figure 2. Representative American elderberry compound cytotoxicity in ARE assay in HepG2 cell line (n=2).

Supplementary Table 3. IC<sub>50</sub> concentration of AE putative compounds against HIV strains NL4-2 and BaL

| No. | Compound name                                  | NL4-3 |       | BaL   |      |
|-----|------------------------------------------------|-------|-------|-------|------|
|     |                                                | Mean  | SD    | Mean  | SD   |
| 1   | Caffeic acid                                   | 97.14 | 13.97 | >100  | 0.00 |
| 2   | 4-caffeoylquinic acid (cryptochlorogenic acid) | >100  | 0.00  | >100  | 0.00 |
| 3   | Catechin hydrate                               | NI    | NI    | NI    | NI   |
| 4   | Chlorogenic acid (5-caffeoylquinic acid)       | NI    | NI    | NI    | NI   |
| 5   | p-Coumaric acid                                | NI    | NI    | NI    | NI   |
| 6   | Cyanidin 3,5- <i>O</i> -diglucoside            | NI    | NI    | NI    | NI   |
| 7   | Cyanidin 3- <i>O</i> -galactoside              | 55.95 | 3.57  | >100  | 0.00 |
| 8   | Cyanidin 3- <i>O</i> -glucoside                | 65.77 | 11.68 | >100  | 0.00 |
| 9   | Cyanidin 3- <i>O</i> -rutinoside               | >100  | 0.00  | >100  | 0.00 |
| 10  | Cyanidin 3- <i>O</i> -sambubioside             | 51.28 | 2.10  | >100  | 0.00 |
| 11  | Cyanidin 3- <i>O</i> -sophoroside              | 53.31 | 5.10  | 87.37 | 2.88 |
| 12  | Delphinidin 3- <i>O</i> -rutinoside            | 34.92 | 1.25  | 97.52 | 9.13 |
| 13  | 3-4, Dihydroxybenzoic acid                     | NI    | NI    | NI    | NI   |
| 14  | (-)-Epicatechin                                | NI    | NI    | NI    | NI   |
| 15  | Ferulic acid                                   | NI    | NI    | NI    | NI   |
| 16  | Gallic acid                                    | 6.24  | 0.12  | 6.24  | 0.12 |
| 17  | Hyperoside (Quercetin 3-galactoside)           | NI    | NI    | NI    | NI   |
| 18  | Isorhamnetin                                   | 0.64  | 0.01  | 2.22  | 0.69 |
| 19  | Isorhamnetin 3-rutinoside                      | NI    | NI    | NI    | NI   |
| 20  | Kaempferol                                     | 2.45  | 0.28  | 8.73  | 0.70 |
| 21  | Kaempferol 3-glucoside                         | NI    | NI    | NI    | NI   |
| 22  | Kaempferol 3- <i>O</i> -rutinoside             | NI    | NI    | NI    | NI   |
| 23  | Luteolin                                       | 1.32  | 0.05  | 1.77  | 0.02 |
| 24  | Myricetin                                      | 3.11  | 0.12  | 2.97  | 1.39 |
| 25  | Naringenin                                     | NI    | NI    | NI    | NI   |
| 26  | Neochlorogenic acid (3-caffeoylquinic acid)    | NI    | NI    | NI    | NI   |
| 27  | Pelargonidin 3- <i>O</i> -glucoside            | NI    | NI    | NI    | NI   |
| 28  | Peonidin 3- <i>O</i> -glucoside                | NI    | NI    | NI    | NI   |
| 29  | Quercetin                                      | 2.49  | 0.24  | 3.84  | 0.56 |
| 30  | Quercetin-3- $\beta$ -D-glucoside (hirsutrin)  | >100  | 0.00  | >100  | 0.00 |
| 31  | Rutin (Quercetin-3-rutinoside)                 | NI    | NI    | NI    | NI   |
| 32  | Isorhamnetin 3- <i>O</i> -glucoside            | NI    | NI    | NI    | NI   |

\*NI = No inhibition.

\*\*Compounds with an IC<sub>50</sub> concentration greater than 100 $\mu$ M were found to have no inhibitory on the growth of *S. aureus* (n=2).

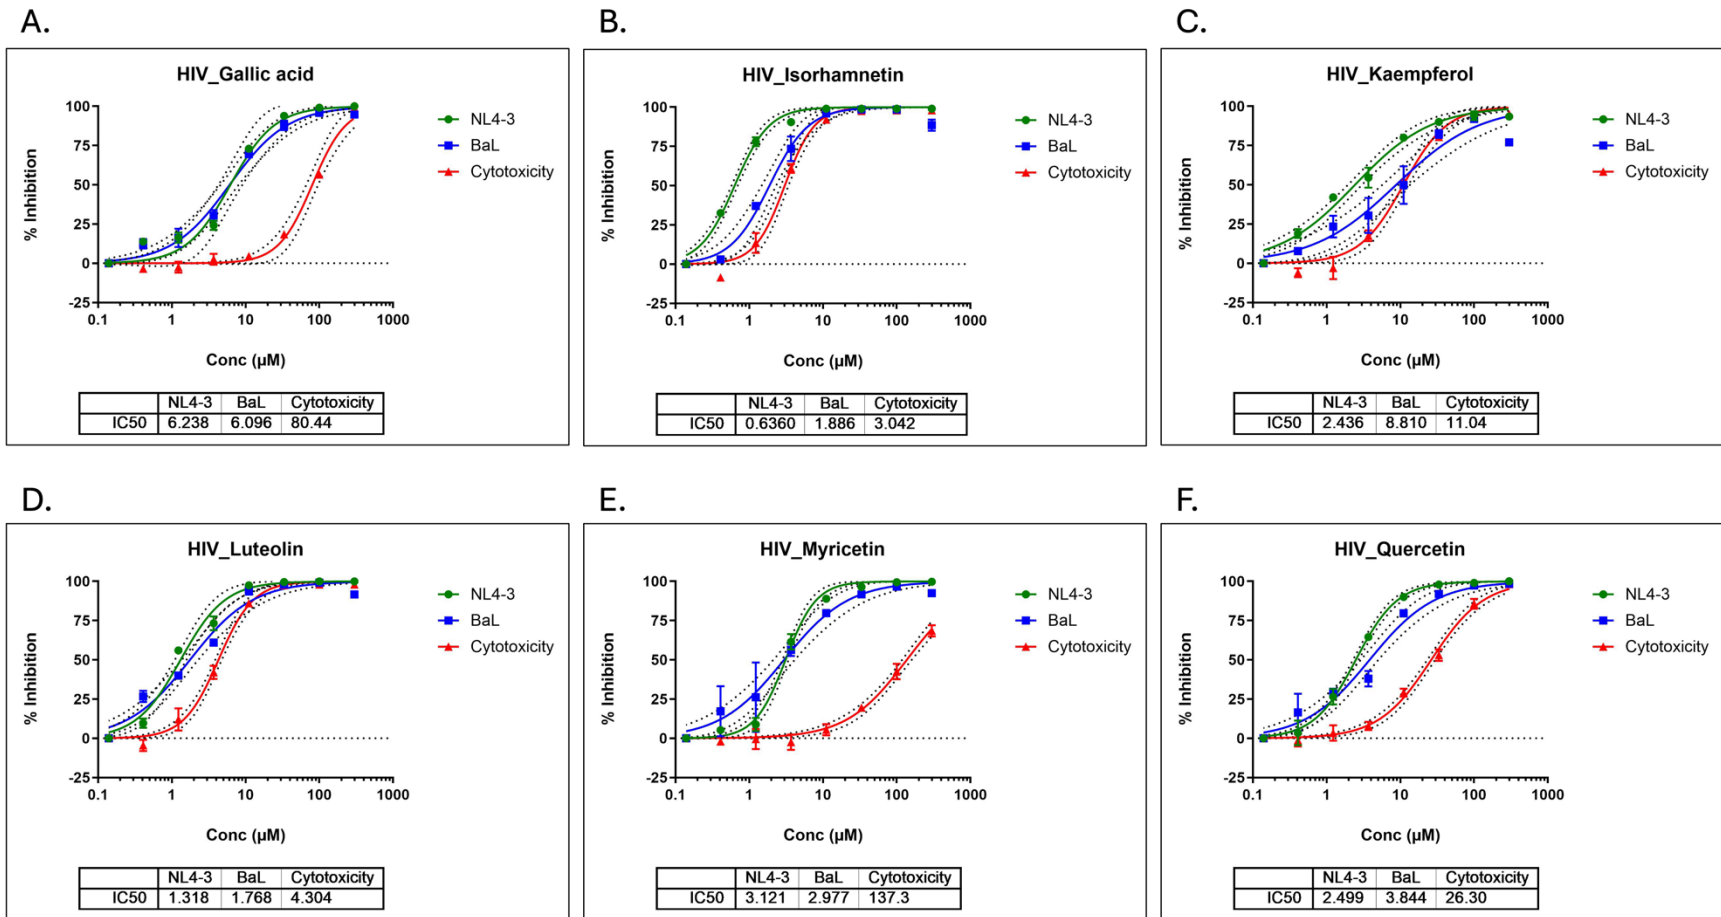

Supplementary Figure 3. Antiviral activity of American elderberry compounds against HIV strains NL4-3 and BaL (n=2).

Supplementary Table 4. The IC<sub>50</sub> concentration of American elderberry putative compounds against *S. aureus*

| No. | Compounds                                      | IC <sub>50</sub> (μM) | SD   |
|-----|------------------------------------------------|-----------------------|------|
| 1   | Caffeic acid                                   | NI                    | NI   |
| 2   | 4-caffeoylquinic acid (cryptochlorogenic acid) | NI                    | NI   |
| 3   | Catechin hydrate                               | NI                    | NI   |
| 4   | Chlorogenic acid (5-caffeoylquinic acid)       | NI                    | NI   |
| 5   | p-Coumaric acid                                | NI                    | NI   |
| 6   | Cyanidin 3,5- <i>O</i> -diglucoside            | NI                    | NI   |
| 7   | Cyanidin 3- <i>O</i> -galactoside              | 21.95                 | 0.37 |
| 8   | Cyanidin 3- <i>O</i> -glucoside                | 10.27                 | 0.52 |
| 9   | Cyanidin 3- <i>O</i> -rutinoside               | 8.44                  | 0.01 |
| 10  | Cyanidin 3- <i>O</i> -sambubioside             | 16.78                 | 0.92 |
| 11  | Cyanidin 3- <i>O</i> -sophoroside              | 32.36                 | 9.19 |
| 12  | Delphinidin 3- <i>O</i> -rutinoside            | 22.00                 | 2.66 |
| 13  | 3-4, Dihydroxybenzoic acid                     | NI                    | NI   |
| 14  | (-)-Epicatechin                                | NI                    | NI   |
| 15  | Ferulic acid                                   | NI                    | NI   |
| 16  | Gallic acid                                    | NI                    | NI   |
| 17  | Hyperoside (Quercetin 3-galactoside)           | NI                    | NI   |
| 18  | Isorhamnetin                                   | NI                    | NI   |
| 19  | Isorhamnetin 3-rutinoside                      | NI                    | NI   |
| 20  | Kaempferol                                     | NI                    | NI   |
| 21  | Kaempferol 3-glucoside                         | NI                    | NI   |
| 22  | Kaempferol 3- <i>O</i> -rutinoside             | NI                    | NI   |
| 23  | Luteolin                                       | NI                    | NI   |
| 24  | Myricetin                                      | NI                    | NI   |
| 25  | Naringenin                                     | NI                    | NI   |
| 26  | Neochlorogenic acid (3-caffeoylquinic acid)    | NI                    | NI   |
| 27  | Pelargonidin 3- <i>O</i> -glucoside            | 46.45                 | 5.78 |
| 28  | Peonidin 3- <i>O</i> -glucoside                | 28.65                 | 2.25 |
| 29  | Quercetin                                      | >100                  | 0.00 |
| 30  | Quercetin-3-β-D-glucoside (hirsutrin)          | NI                    | NI   |
| 31  | Rutin (Quercetin-3-rutinoside)                 | NI                    | NI   |
| 32  | Isorhamnetin 3- <i>O</i> -glucoside            | NI                    | NI   |
| 33  | Vancomycin (Control +)                         | 2.16                  | 0.42 |

\*NI = No inhibition.

\*\*Compounds with an IC<sub>50</sub> concentration greater than 100μM were found to have no inhibitory on the growth of *S. aureus* (n=2).

## Supplementary References

1. Vincent, S., Stanely, S. P. & Ponnian, S. M. P. Protective effects of 3, 4-dihydroxybenzoic acid on myocardial infarction induced by isoproterenol in rats. *J Biochem & Molecular Tox* **38**, e23773 (2024).
2. Sampaio-Dias, I. E. *et al.* Discovery of new potent positive allosteric modulators of dopamine D<sub>2</sub> receptors: insights into the bioisosteric replacement of proline to 3-furoic acid in the melanostatin neuropeptide. *J. Med. Chem.* **64**, 6209–6220 (2021).
3. Küpeli Akkol, E., Genç, Y., Karpuz, B., Sobarzo-Sánchez, E. & Capasso, R. Coumarins and Coumarin-Related Compounds in Pharmacotherapy of Cancer. *Cancers* **12**, 1959 (2020).
4. Barot, K. P., Jain, S. V., Kremer, L., Singh, S. & Ghate, M. D. Recent advances and therapeutic journey of coumarins: current status and perspectives. *Med Chem Res* **24**, 2771–2798 (2015).
5. De Andrade Gonçalves, P. *et al.* Study of sodium 3-hydroxycoumarin as inhibitors in vitro, in vivo and in silico of *Moniliophthora perniciosa* fungus. *Eur J Plant Pathol* **153**, 15–27 (2019).
6. Ma, X. *et al.* Anti-Inflammatory Activity and Mechanism of Cryptochlorogenic Acid from *Ageratina adenophora*. *Nutrients* **14**, 439 (2022).
7. Zhou, Y. The Protective Effects of Cryptochlorogenic Acid on  $\beta$ -Cells Function in Diabetes in vivo and vitro via Inhibition of Ferroptosis. *DMSO Volume* **13**, 1921–1931 (2020).
8. Chen, K.-Y. *et al.* 3-Hydroxybenzaldehyde and 4-Hydroxybenzaldehyde enhance survival of mouse astrocytes treated with *Angiostrongylus cantonensis* young adults excretory/secretory products. *Biomedical Journal* **44**, S258–S266 (2021).
9. Kang, C. W. *et al.* 4-Hydroxybenzaldehyde accelerates acute wound healing through activation of focal adhesion signalling in keratinocytes. *Sci Rep* **7**, 14192 (2017).
10. Kim, D.-W. *et al.* Neuroprotection against 6-OHDA-induced oxidative stress and apoptosis in SH-SY5Y cells by 5,7-Dihydroxychromone: Activation of the Nrf2/ARE pathway. *Life Sciences* **130**, 25–30 (2015).
11. Koo, H. J., Kwak, J. H. & Kang, S. C. Anti-diabetic properties of *Daphniphyllum macropodum* fruit and its active compound. *Bioscience, Biotechnology, and Biochemistry* **78**, 1392–1401 (2014).
12. Wang, B. *et al.* Prenylated chromones and flavonoids isolated from the roots of *Flemingia macrophylla* and their anti-lung cancer activity. *Chin Med* **18**, 153 (2023).
13. Hang, S. *et al.* Daphnetin, a Coumarin in Genus *Stellera Chamaejasme* Linn: Chemistry, Bioactivity and Therapeutic Potential. *Chemistry & Biodiversity* **19**, e202200261 (2022).
14. Yan, L. *et al.* 7,8-Dihydroxycoumarin Alleviates Synaptic Loss by Activated PI3K-Akt-CREB-BDNF Signaling in Alzheimer's Disease Model Mice. *J. Agric. Food Chem.* **70**, 7130–7138 (2022).
15. Anderson, J. E., Chang, C.-J. & McLaughlin, J. L. Bioactive Components of *Allamanda schottii*. *J. Nat. Prod.* **51**, 307–308 (1988).

16. Kupchan, S. M., Dessertine, A. L., Blaylock, B. T. & Bryan, R. F. Isolation and structural elucidation of allamandin, and antileukemic iridoid lactone from allamanda cathartica. *J. Org. Chem.* **39**, 2477–2482 (1974).
17. Cebrian-Torrejon, G. Study of the Toxicity and Antiviral Effect of Natural Compounds Extracted from Pseudospinx Tetrio and Allamanda Cathartica on Sars-Cov-2 Infection. (2024).
18. El-Kersh, D. M. *et al.* GC-MS metabolites profiling of anethole-rich oils by different extraction techniques: antioxidant, cytotoxicity and *in-silico* enzymes inhibitory insights. *Journal of Enzyme Inhibition and Medicinal Chemistry* **37**, 1974–1986 (2022).
19. Lal, M. *et al.* Anethole rich Clausena heptaphylla (Roxb.) Wight & Arn., essential oil pharmacology and genotoxic efficiencies. *Sci Rep* **12**, 9978 (2022).
20. Henley-Smith, C. J. *et al.* Biological Activities of Heteropyxis natalensis Against Micro-Organisms Involved in Oral Infections. *Front. Pharmacol.* **9**, 291 (2018).
21. Janpajjit, S. *et al.* Cleistocalyx nervosum var. paniala Berry Seed Protects against TNF- $\alpha$ -Stimulated Neuroinflammation by Inducing HO-1 and Suppressing NF- $\kappa$ B Mechanism in BV-2 Microglial Cells. *Molecules* **28**, 3057 (2023).
22. Zhang, M. *et al.* Antioxidant Mechanism of Betaine without Free Radical Scavenging Ability. *J. Agric. Food Chem.* **64**, 7921–7930 (2016).
23. Zhao, G. *et al.* Betaine in Inflammation: Mechanistic Aspects and Applications. *Front. Immunol.* **9**, 1070 (2018).
24. Cole, J. R., Bianchi, E. & Trumbull, E. R. Antitumor Agents from Bursera microphylla (Burseraceae) II: Isolation of a New Lignan—Burseran. *Journal of Pharmaceutical Sciences* **58**, 175–176 (1969).
25. Gigliarelli, G. *et al.* Two new lignans from the resin of *Bursera microphylla* A. gray and their cytotoxic activity. *Natural Product Research* **32**, 2646–2651 (2018).
26. Pablo Nunez, M. A. Cytotoxic and Anti-inflammatory Activities of Bursera species from Mexico. *J Clin Toxicol* **05**, (2014).
27. Torres-Moreno, H. *et al.* Seasonality impact on the anti-inflammatory, antiproliferative potential and the lignan composition of Bursera microphylla. *Industrial Crops and Products* **184**, 115095 (2022).
28. Magnani, C., Isaac, V. L. B., Correa, M. A. & Salgado, H. R. N. Caffeic acid: a review of its potential use in medications and cosmetics. *Anal. Methods* **6**, 3203–3210 (2014).
29. Whitby, K. *et al.* Castanospermine, a Potent Inhibitor of Dengue Virus Infection In Vitro and In Vivo. *J Virol* **79**, 8698–8706 (2005).
30. Partis, A., Mueller, A. & Chrest, J. The  $\alpha$ -Glucosidase I Inhibitor Castanospermine Alters Endothelial Cell Glycosylation, Prevents Angiogenesis, and Inhibits Tumor Growth. (1995).
31. Isemura, M. Catechin in Human Health and Disease. *Molecules* **24**, 528 (2019).
32. Johnson, R., Bryant, S. & Huntley, A. L. Green tea and green tea catechin extracts: An overview of the clinical evidence. *Maturitas* **73**, 280–287 (2012).

33. Bastola, T., An, R., Kim, Y.-C., Kim, J. & Seo, J. Cearoin Induces Autophagy, ERK Activation and Apoptosis via ROS Generation in SH-SY5Y Neuroblastoma Cells. *Molecules* **22**, 242 (2017).
34. Funakoshi-Tago, M. *et al.* Inhibitory effects of flavonoids extracted from Nepalese propolis on the LPS signaling pathway. *International Immunopharmacology* **40**, 550–560 (2016).
35. Marinov, T., Kokanova-Nedialkova, Z. & Nedialkov, P. T. Naturally Occurring Simple Oxygenated Benzophenones: Structural Diversity, Distribution, and Biological Properties. *Diversity* **15**, 1030 (2023).
36. Lou, Z., Wang, H., Zhu, S., Ma, C. & Wang, Z. Antibacterial Activity and Mechanism of Action of Chlorogenic Acid. *Journal of Food Science* **76**, (2011).
37. Naveed, M. *et al.* Chlorogenic acid (CGA): A pharmacological review and call for further research. *Biomedicine & Pharmacotherapy* **97**, 67–74 (2018).
38. Reis, J., Gaspar, A., Milhazes, N. & Borges, F. Chromone as a privileged scaffold in drug discovery: recent advances: miniperspective. *J. Med. Chem.* **60**, 7941–7957 (2017).
39. Mohsin, N. U. A., Irfan, M., Hassan, S. U. & Saleem, U. Current Strategies in Development of New Chromone Derivatives with Diversified Pharmacological Activities: A Review. *Pharm Chem J* **54**, 241–257 (2020).
40. Friedman, M. Chemistry, Antimicrobial Mechanisms, and Antibiotic Activities of Cinnamaldehyde against Pathogenic Bacteria in Animal Feeds and Human Foods. *J. Agric. Food Chem.* **65**, 10406–10423 (2017).
41. Zhu, R. *et al.* Cinnamaldehyde in diabetes: A review of pharmacology, pharmacokinetics and safety. *Pharmacological Research* **122**, 78–89 (2017).
42. Abdel-Salam, O. M. E. *et al.* Citric Acid Effects on Brain and Liver Oxidative Stress in Lipopolysaccharide-Treated Mice. *Journal of Medicinal Food* **17**, 588–598 (2014).
43. Jeszka-Skowron, M., Krawczyk, M. & Zgoła-Grześkowiak, A. Determination of antioxidant activity, rutin, quercetin, phenolic acids and trace elements in tea infusions: Influence of citric acid addition on extraction of metals. *Journal of Food Composition and Analysis* **40**, 70–77 (2015).
44. Buccafusco, J. J. & Terry, A. V. The potential role of cotinine in the cognitive and neuroprotective actions of nicotine. *Life Sciences* **72**, 2931–2942 (2003).
45. Monteiro-Neto, V. *et al.* Cuminaldehyde potentiates the antimicrobial actions of ciprofloxacin against *Staphylococcus aureus* and *Escherichia coli*. *PLoS ONE* **15**, e0232987 (2020).
46. Ghiasi, F. *et al.* A novel promising delivery system for cuminaldehyde using gelled lipid nanoparticles: Characterization and anticancer, antioxidant, and antibacterial activities. *International Journal of Pharmaceutics* **610**, 121274 (2021).
47. Liang, Z., Liang, H., Guo, Y. & Yang, D. Cyanidin 3-O-galactoside: A Natural Compound with Multiple Health Benefits. *IJMS* **22**, 2261 (2021).



48. Lee, J. H. & Choung, M.-G. Identification and characterisation of anthocyanins in the antioxidant activity-containing fraction of *Liriope platyphylla* fruits. *Food Chemistry* **127**, 1686–1693 (2011).
49. Olivas-Aguirre, F. *et al.* Cyanidin-3-O-glucoside: Physical-Chemistry, Foodomics and Health Effects. *Molecules* **21**, 1264 (2016).
50. Lee, S. G. *et al.* Contribution of Anthocyanin Composition to Total Antioxidant Capacity of Berries. *Plant Foods Hum Nutr* **70**, 427–432 (2015).
51. Lee, S.-J., Hong, S., Yoo, S.-H. & Kim, G.-W. Cyanidin-3-O-Sambubioside from *Acanthopanax sessiliflorus* Fruit Inhibits Metastasis by Downregulating MMP-9 in Breast Cancer Cells MDA-MB-231. *Planta Med* **79**, 1636–1640 (2013).
52. Ojeda, D. *et al.* Inhibition of angiotensin convertin enzyme (ACE) activity by the anthocyanins delphinidin- and cyanidin-3-O-sambubiosides from *Hibiscus sabdariffa*. *Journal of Ethnopharmacology* **127**, 7–10 (2010).
53. Qiu, P. *et al.* The effect of anthocyanin from *Dioscorea alata* L. after purification, identification on antioxidant capacity in mice. *Food Science & Nutrition* **11**, 6106–6115 (2023).
54. Zhang, C.-P. *et al.* The Effective Analysis for Blue Honeysuckle Extract in the Treatment of Hepatocellular Carcinoma. *Evidence-Based Complementary and Alternative Medicine* **2022**, 1–13 (2022).
55. Laganà, G. *et al.* Evaluation of Anthocyanin Profile, Antioxidant, Cytoprotective, and Anti-Angiogenic Properties of *Callistemon citrinus* Flowers. *Plants* **9**, 1045 (2020).
56. Seo, J. *et al.* *Rosa gallica* and its active compound, cyanidin-3, 5-*O* -diglucoside, improve skin hydration via the GLK signaling pathway. *BioFactors* **49**, 415–427 (2023).
57. Burmudžija, A. Z. *et al.* Cytotoxic and Antimicrobial Activity of Dehydrozingerone based Cyclopropyl Derivatives. *Chemistry & Biodiversity* **14**, e1700077 (2017).
58. Kuo, P.-C. *et al.* Isolation of a Natural Antioxidant, Dehydrozingerone from *Zingiber officinale* and Synthesis of Its Analogues for Recognition of Effective Antioxidant and Antityrosinase Agents. *Arch Pharm Res* **28**, 518–528 (2005).
59. Lee, E. S. *et al.* Dehydrozingerone inhibits renal lipotoxicity in high-fat diet–induced obese mice. *J Cellular Molecular Medi* **25**, 8725–8733 (2021).
60. Moorkoth, S. *et al.* Antidepressant-like effect of dehydrozingerone from *Zingiber officinale* by elevating monoamines in brain: in silico and in vivo studies. *Pharmacol. Rep* **73**, 1273–1286 (2021).
61. Miladinovic, B., Faria, M. Â., Ribeiro, M., Sobral, M. M. C. & Ferreira, I. M. P. L. V. O. Delphinidin-3-rutinoside from Blackcurrant Berries (*Ribes nigrum*): In Vitro Antiproliferative Activity and Interactions with Other Phenolic Compounds. *Molecules* **28**, 1286 (2023).
62. Xie, J., Cui, H., Xu, Y., Xie, L. & Chen, W. Delphinidin-3-*O* -sambubioside: a novel xanthine oxidase inhibitor identified from natural anthocyanins. *Food Quality and Safety* **5**, fyaa038 (2021).

63. Dinday, M. T. & Baraban, S. C. Large-Scale Phenotype-Based Antiepileptic Drug Screening in a Zebrafish Model of Dravet Syndrome. *eneuro* **2**, ENEURO.0068-15.2015 (2015).
64. Zhang, L., Ke, W., Zhao, X. & Lu, Z. Resina Draconis extract exerts ANTI-HCC effects through METTL3-M6A-SURVIVIN axis. *Phytotherapy Research* **36**, 2542–2557 (2022).
65. Daussin, F. N., Heyman, E. & Burelle, Y. Effects of (–)-epicatechin on mitochondria. *Nutrition Reviews* **79**, 25–41 (2021).
66. Navarrete-Yañez, V. *et al.* Effects of (–)-epicatechin on neuroinflammation and hyperphosphorylation of tau in the hippocampus of aged mice. *Food Funct.* **11**, 10351–10361 (2020).
67. Qu, Z. *et al.* Advances in physiological functions and mechanisms of (–)-epicatechin. *Critical Reviews in Food Science and Nutrition* **61**, 211–233 (2021).
68. Coêlho, M. L. *et al.* Cytotoxic and Antioxidant Properties of Natural Bioactive Monoterpenes Nerol, Estragole, and 3,7-Dimethyl-1-Octanol. *Advances in Pharmacological and Pharmaceutical Sciences* **2022**, 1–11 (2022).
69. Filho, A. C. M. L. *et al.* Inhibition of neutrophil migration and reduction of oxidative stress by ethyl p-coumarate in acute and chronic inflammatory models. *Phytomedicine* **57**, 9–17 (2019).
70. Li, W. *et al.* Ethyl p -coumarate exerts antifungal activity in vitro and in vivo against fruit *Alternaria alternata* via membrane-targeted mechanism. *International Journal of Food Microbiology* **278**, 26–35 (2018).
71. Ou, S. & Kwok, K. Ferulic acid: pharmaceutical functions, preparation and applications in foods. *J Sci Food Agric* **84**, 1261–1269 (2004).
72. Zhu, H. *et al.* Anti-Inflammatory Effects of the Bioactive Compound Ferulic Acid Contained in *Oldenlandia diffusa* on Collagen-Induced Arthritis in Rats. *Evidence-Based Complementary and Alternative Medicine* **2014**, 573801 (2014).
73. Bai, J. *et al.* Gallic acid: Pharmacological activities and molecular mechanisms involved in inflammation-related diseases. *Biomedicine & Pharmacotherapy* **133**, 110985 (2021).
74. Liu, Y. *et al.* A Review on Central Nervous System Effects of Gastrodin. *Front. Pharmacol.* **9**, 24 (2018).
75. Tang, C. *et al.* Comparative pharmacokinetics of gastrodin in rats after intragastric administration of free gastrodin, parishin and *Gastrodia elata* extract. *Journal of Ethnopharmacology* **176**, 49–54 (2015).
76. Sanci, T. O. *et al.* Effect of herniarin on cell viability, cell cycle, and erk protein levels in different stages of bladder cancer cells. *Chemistry & Biodiversity* **21**, e202301645 (2024).
77. Mustafa, Y. F. & Abdulaziz, N. T. ANTICANCER POTENTIAL OF HYMECROMONE-BASED COMPOUNDS : A REVIEW.
78. Wang, Q. *et al.* Hyperoside: A review on its sources, biological activities, and molecular mechanisms. *Phytotherapy Research* **36**, 2779–2802 (2022).
79. Wlodarska, M. *et al.* Indoleacrylic Acid Produced by Commensal *Peptostreptococcus* Species Suppresses Inflammation. *Cell Host & Microbe* **22**, 25-37.e6 (2017).

80. Schrader, K., Ibrahim, M., Abd-Alla, H., Cantrell, C. & Pasco, D. Antibacterial activities of metabolites from vitis rotundifolia (muscadine) roots against fish pathogenic bacteria. *Molecules* **23**, 2761 (2018).
81. Subramanian, R., Raj, V., Manigandan, K. & Elangovan, N. Antioxidant activity of hopeaphenol isolated from *Shorea roxburghii* stem bark extract. *Journal of Taibah University for Science* **9**, 237–244 (2015).
82. Tietjen, I. *et al.* The Natural Stilbenoid (–)-Hopeaphenol Inhibits HIV Transcription by Targeting Both PKC and NF-κB Signaling and Cyclin-Dependent Kinase 9. *Antimicrob Agents Chemother* **67**, e01600-22 (2023).
83. Gong, G. *et al.* Isorhamnetin: A review of pharmacological effects. *Biomedicine & Pharmacotherapy* **128**, 110301 (2020).
84. Xu, Y. *et al.* Cardioprotective effect of isorhamnetin against myocardial ischemia reperfusion (I/R) injury in isolated rat heart through attenuation of apoptosis. *J Cellular Molecular Medi* **24**, 6253–6262 (2020).
85. Vincent Brice Ayissi, O., Borris Rt, G. & Paul Fewou, M. In Silico Identification of Apigenin and Narcissin (Food-Flavonoids) as Potential Targets Against SARS-CoV-2 Viral Proteins: Comparison with the Effect of Remdesivir. *J Clin Anesth Pain Manag* **5**, (2021).
86. Rigano, D. *et al.* Antibacterial activity of flavonoids and phenylpropanoids from *Marrubium globosum* ssp. *libanoticum*. *Phytotherapy Research* **21**, 395–397 (2007).
87. Yoo, G. *et al.* Efficient preparation of narcissin from *Opuntia ficus-indica* fruits by combination of response surface methodology and high-speed countercurrent chromatography. *Phcog Mag* **14**, 338 (2018).
88. Ahn, H. J. *et al.* Microbial biocatalysis of quercetin-3-glucoside and isorhamnetin-3-glucoside in *Salicornia herbacea* and their contribution to improved anti-inflammatory activity. *RSC Adv.* **10**, 5339–5350 (2020).
89. Devi, K. P. *et al.* Kaempferol and inflammation: From chemistry to medicine. *Pharmacological Research* **99**, 1–10 (2015).
90. Periferakis, A. *et al.* Kaempferol: Antimicrobial Properties, Sources, Clinical, and Traditional Applications. *IJMS* **23**, 15054 (2022).
91. Riaz, A. *et al.* Astragalins: a bioactive phytochemical with potential therapeutic activities. *Advances in Pharmacological Sciences* **2018**, 1–15 (2018).
92. Habtemariam, S. α-Glucosidase Inhibitory Activity of Kaempferol-3- O -rutinoside. *Natural Product Communications* **6**, 1934578X1100600 (2011).
93. Wang, Y., Tang, C. & Zhang, H. Hepatoprotective effects of kaempferol 3-O-rutinoside and kaempferol 3-O-glucoside from *Carthamus tinctorius* L. on CCl<sub>4</sub>-induced oxidative liver injury in mice. *Journal of Food and Drug Analysis* **23**, 310–317 (2015).
94. Dulińska-Litewka, J. *et al.* Could the kinetin riboside be used to inhibit human prostate cell epithelial–mesenchymal transition? *Med Oncol* **37**, 17 (2020).
95. Totoń, E. *et al.* Cytotoxic effects of kinetin riboside and its selected analogues on cancer cell lines. *Bioorganic & Medicinal Chemistry Letters* **100**, 129628 (2024).

96. Esposito, F. *et al.* Kuwanon-L as a New Allosteric HIV-1 Integrase Inhibitor: Molecular Modeling and Biological Evaluation. *ChemBioChem* **16**, 2507–2512 (2015).
97. Jin, S. E., Ha, H., Shin, H.-K. & Seo, C.-S. Anti-Allergic and Anti-Inflammatory Effects of Kuwanon G and Morusin on MC/9 Mast Cells and HaCaT Keratinocytes. *Molecules* **24**, 265 (2019).
98. Wei, B., Yang, W., Yan, Z.-X., Zhang, Q.-W. & Yan, R. Prenylflavonoids sanggenon C and kuwanon G from mulberry (*Morus alba* L.) as potent broad-spectrum bacterial  $\beta$ -glucuronidase inhibitors: Biological evaluation and molecular docking studies. *Journal of Functional Foods* **48**, 210–219 (2018).
99. Alabsi, A., Khoudary, A. C. & Abdelwahed, W. The Antidepressant Effect of L-Tyrosine-Loaded Nanoparticles: Behavioral Aspects. *Ann Neurosci* **23**, 89–99 (2016).
100. Gülçin, İ. Comparison of in vitro antioxidant and antiradical activities of L-tyrosine and L-Dopa. *Amino Acids* **32**, 431–438 (2007).
101. Jian, H. *et al.* Effects of Dietary Valine Levels on Production Performance, Egg Quality, Antioxidant Capacity, Immunity, and Intestinal Amino Acid Absorption of Laying Hens during the Peak Lay Period. *Animals* **11**, 1972 (2021).
102. Barreca, D., Bellocco, E., Leuzzi, U. & Gattuso, G. First evidence of C- and O-glycosyl flavone in blood orange (*Citrus sinensis* (L.) Osbeck) juice and their influence on antioxidant properties. *Food Chemistry* **149**, 244–252 (2014).
103. Imran, M. *et al.* Luteolin, a flavonoid, as an anticancer agent: A review. *Biomedicine & Pharmacotherapy* **112**, 108612 (2019).
104. Lin, Y., Shi, R., Wang, X. & Shen, H.-M. Luteolin, a flavonoid with potentials for cancer prevention and therapy. (2009).
105. Lu, P. *et al.* A Literature Review on the Antiviral Mechanism of Luteolin. *Natural Product Communications* **18**, 1934578X2311715 (2023).
106. Zima, V. *et al.* Unraveling the anti-influenza effect of flavonoids: Experimental validation of luteolin and its congeners as potent influenza endonuclease inhibitors. *European Journal of Medicinal Chemistry* **208**, 112754 (2020).
107. Ghosh, A. K. & Lee, D. S. Enantioselective Total Synthesis of (+)-Monocerin, a Dihydroisocoumarin Derivative with Potent Antimalarial Properties. *J. Org. Chem.* **84**, 6191–6198 (2019).
108. Guil-Guerrero, J. L. Stearidonic acid (18:4 *n* -3): Metabolism, nutritional importance, medical uses and natural sources. *Euro J Lipid Sci & Tech* **109**, 1226–1236 (2007).
109. Subedi, K. *et al.* Stearidonic acid-enriched flax oil reduces the growth of human breast cancer in vitro and in vivo. *Breast Cancer Res Treat* **149**, 17–29 (2015).
110. Sung, J., Jeon, H., Kim, I., Jeong, H. S. & Lee, J. Anti-Inflammatory Effects of Stearidonic Acid Mediated by Suppression of NF- $\kappa$ B and MAP-Kinase Pathways in Macrophages. *Lipids* **52**, 781–787 (2017).
111. Song, X. *et al.* Myricetin: A review of the most recent research. *Biomedicine & Pharmacotherapy* **134**, 111017 (2021).

112. Lee, J. Y. & Park, W. Anti-Inflammatory Effect of Myristicin on RAW 264.7 Macrophages Stimulated with Polyinosinic-Polycytidylic Acid. *Molecules* **16**, 7132–7142 (2011).
113. Seneme, E. F., Dos Santos, D. C., Silva, E. M. R., Franco, Y. E. M. & Longato, G. B. Pharmacological and therapeutic potential of myristicin: a literature review. *Molecules* **26**, 5914 (2021).
114. Zheng, G. Qiang., Kenney, P. M. & Lam, L. K. T. Myristicin: a potential cancer chemopreventive agent from parsley leaf oil. *J. Agric. Food Chem.* **40**, 107–110 (1992).
115. Joshi, R., Kulkarni, Y. A. & Wairkar, S. Pharmacokinetic, pharmacodynamic and formulations aspects of Naringenin: An update. *Life Sciences* **215**, 43–56 (2018).
116. Stabrauskiene, J., Kopustinskiene, D. M., Lazauskas, R. & Bernatoniene, J. Naringin and Naringenin: Their Mechanisms of Action and the Potential Anticancer Activities. *Biomedicines* **10**, 1686 (2022).
117. Gao, X. *et al.* Anti-Inflammatory Effects of Neochlorogenic Acid Extract from Mulberry Leaf (*Morus alba* L.) Against LPS-Stimulated Inflammatory Response through Mediating the AMPK/Nrf2 Signaling Pathway in A549 Cells. *Molecules* **25**, 1385 (2020).
118. Navarro-Orcajada, S., Matencio, A., Vicente-Herrero, C., García-Carmona, F. & López-Nicolás, J. M. Study of the fluorescence and interaction between cyclodextrins and neochlorogenic acid, in comparison with chlorogenic acid. *Sci Rep* **11**, 3275 (2021).
119. Julius, U. Niacin as antidyslipidemic drug. *Can. J. Physiol. Pharmacol.* **93**, 1043–1054 (2015).
120. Freitas, C. S. *et al.* Anti-inflammatory and Anti-nociceptive Activity of Ruthenium Complexes with Isonicotinic and Nicotinic Acids (Niacin) as Ligands. *J. Med. Chem.* **58**, 4439–4448 (2015).
121. Marques, C. *et al.* Mechanistic Insights into the Multiple Functions of Niacinamide: Therapeutic Implications and Cosmeceutical Applications in Functional Skincare Products. *Antioxidants* **13**, 425 (2024).
122. Matts, P. J., Oblong, J. E. & Bissett, D. L. A Review of the Range of Effects of Niacinamide in Human Skin. **5**, (2002).
123. Kunkele, A. *et al.* Pharmacological activation of the p53 pathway by nutlin-3 exerts anti-tumoral effects in medulloblastomas. *Neuro-Oncology* **14**, 859–869 (2012).
124. Pishas, K. I. *et al.* Nutlin-3a is a potential therapeutic for ewing sarcoma. *Clinical Cancer Research* **17**, 494–504 (2011).
125. Shen, Y. *et al.* Protective effects of p-coumaric acid against oxidant and hyperlipidemia-an in vitro and in vivo evaluation. *Biomedicine & Pharmacotherapy* **111**, 579–587 (2019).
126. Boz, H. p -Coumaric acid in cereals: presence, antioxidant and antimicrobial effects. *Int J of Food Sci Tech* **50**, 2323–2328 (2015).
127. Kong, C., Jeong, C., Choi, J., Kim, K. & Jeong, J. Antiangiogenic Effects of P -Coumaric Acid in Human Endothelial Cells. *Phytotherapy Research* **27**, 317–323 (2013).
128. Bonjardim, L. R. *et al.* Evaluation of the Anti-Inflammatory and Antinociceptive Properties of p-Cymene in Mice. (2014).

129. De Oliveira, T. M. *et al.* Evaluation of *p*-cymene, a natural antioxidant. *Pharmaceutical Biology* **53**, 423–428 (2015).
130. Li, J., Liu, C. & Sato, T. Novel Antitumor Invasive Actions of *p*-Cymene by Decreasing MMP-9/TIMP-1 Expression Ratio in Human Fibrosarcoma HT-1080 Cells. *Biological & Pharmaceutical Bulletin* **39**, 1247–1253 (2016).
131. Marchese, A. *et al.* Update on Monoterpenes as Antimicrobial Agents: A Particular Focus on *p*-Cymene. *Materials* **10**, 947 (2017).
132. Rimmerman, N. *et al.* N-palmitoyl glycine, a novel endogenous lipid that acts as a modulator of calcium influx and nitric oxide production in sensory neurons. *Mol Pharmacol* **74**, 213–224 (2008).
133. Amini, A. M., Muzs, K., Spencer, J. Pe. & Yaqoob, P. Pelargonidin-3- O -glucoside and its metabolites have modest anti-inflammatory effects in human whole blood cultures. *Nutrition Research* **46**, 88–95 (2017).
134. Duarte, L. J. *et al.* Molecular mechanism of action of Pelargonidin-3- O -glucoside, the main anthocyanin responsible for the anti-inflammatory effect of strawberry fruits. *Food Chemistry* **247**, 56–65 (2018).
135. Gowd, V. *et al.* In vitro study of bioaccessibility, antioxidant, and  $\alpha$ -glucosidase inhibitory effect of pelargonidin-3-O-glucoside after interacting with beta-lactoglobulin and chitosan/pectin. *International Journal of Biological Macromolecules* **154**, 380–389 (2020).
136. Chen, P.-N. *et al.* Cyanidin 3-Glucoside and Peonidin 3-Glucoside Inhibit Tumor Cell Growth and Induce Apoptosis In Vitro and Suppress Tumor Growth In Vivo. *Nutrition and Cancer* **53**, 232–243 (2005).
137. Sari, D., Cairns, J., Safitri, A. & Fatchiyah, F. Virtual Prediction of the Delphinidin-3-O-glucoside and Peonidin-3-O-glucoside as Anti-inflammatory of TNF- and #945; Signaling. *Acta Inform Med* **27**, 152 (2019).
138. Narayan, R. *et al.* Picolinic acid is a broad-spectrum inhibitor of enveloped virus entry that restricts SARS-CoV-2 and influenza A virus in vivo. *Cell Reports Medicine* **4**, 101127 (2023).
139. Sharma, R. *et al.* Inhibition of chikungunya virus by picolinate that targets viral capsid protein. *Virology* **498**, 265–276 (2016).
140. Ogata, S., Inoue, K., Ida, C. & Okumura, K. Apoptosis induced by the esters of picolinic acid with alkyl groups in HL-60 cells. **25**, (2018).
141. Ai, L. *et al.* Natural products-based: Synthesis and antifungal activity evaluation of novel L-pyroglutamic acid analogues. *Front. Plant Sci.* **13**, 1102411 (2022).
142. Gang, F. *et al.* Synthesis and bioactivities evaluation of l-pyroglutamic acid analogues from natural product lead. *Bioorganic & Medicinal Chemistry* **26**, 4644–4649 (2018).
143. Boots, A. W., Haenen, G. R. M. M. & Bast, A. Health effects of quercetin: From antioxidant to nutraceutical. *European Journal of Pharmacology* **585**, 325–337 (2008).
144. Li, Y. *et al.* Quercetin, Inflammation and Immunity. *Nutrients* **8**, 167 (2016).

145. Rauf, A. *et al.* Anticancer potential of quercetin: A comprehensive review. *Phytotherapy Research* **32**, 2109–2130 (2018).
146. Li, Y. Q., Zhou, F. C., Gao, F., Bian, J. S. & Shan, F. Comparative Evaluation of Quercetin, Isoquercetin and Rutin as Inhibitors of  $\alpha$ -Glucosidase. *J. Agric. Food Chem.* **57**, 11463–11468 (2009).
147. Ma, C. *et al.* Isoquercetin ameliorates myocardial infarction through anti-inflammation and anti-apoptosis factor and regulating TLR4-NF- $\kappa$ B signal pathway. *Mol Med Report* (2018) doi:10.3892/mmr.2018.8709.
148. Yang, Q., Kang, Z., Zhang, J., Qu, F. & Song, B. Neuroprotective Effects of Isoquercetin: An In Vitro and In Vivo Study. *Cell J* **23**, (2021).
149. Empl, M. T., Albers, M., Wang, S. & Steinberg, P. The Resveratrol Tetramer r-Viniferin Induces a Cell Cycle Arrest Followed by Apoptosis in the Prostate Cancer Cell Line LNCaP: Cytotoxicity of r-Viniferin in LNCaP Cells. *Phytother. Res.* **29**, 1640–1645 (2015).
150. Huber, R. *et al.* Generation of potent antibacterial compounds through enzymatic and chemical modifications of the trans- $\delta$ -viniferin scaffold. *Sci Rep* **13**, 15986 (2023).
151. Esatbeyoglu, T. *et al.* Chemical Characterization, Free Radical Scavenging, and Cellular Antioxidant and Anti-Inflammatory Properties of a Stilbenoid-Rich Root Extract of *Vitis vinifera*. *Oxidative Medicine and Cellular Longevity* **2016**, 8591286 (2016).
152. Satari, A., Ghasemi, S., Habtemariam, S., Asgharian, S. & Lorigooini, Z. Rutin: a flavonoid as an effective sensitizer for anticancer therapy; insights into multifaceted mechanisms and applicability for combination therapy. *Evidence-Based Complementary and Alternative Medicine* **2021**, 1–10 (2021).
153. Ganeshpurkar, A. & Saluja, A. K. The Pharmacological Potential of Rutin. *Saudi Pharmaceutical Journal* **25**, 149–164 (2017).
154. Kong, C.-S. *et al.* Salicin, an Extract from White Willow Bark, Inhibits Angiogenesis by Blocking the ROS-ERK Pathways: SALICIN SUPPRESSES TUMOR ANGIOGENESIS. *Phytother. Res.* **28**, 1246–1251 (2014).
155. Schmid, B., Kötter, I. & Heide, L. Pharmacokinetics of salicin after oral administration of a standardised willow bark extract. *Eur J Clin Pharmacol* **57**, 387–391 (2001).
156. Zhai, K. *et al.* Salicin from *Alangium chinense* Ameliorates Rheumatoid Arthritis by Modulating the Nrf2-HO-1-ROS Pathways. *J. Agric. Food Chem.* **66**, 6073–6082 (2018).
157. Sharif, H. M. A., Ahmed, D. & Mir, H. Antimicrobial salicylaldehyde schiff bases: synthesis, characterization and evaluation. (2015).
158. Hu, X. *et al.* A preliminary study: the anti-proliferation effect of salidroside on different human cancer cell lines. *Cell Biol Toxicol* **26**, 499–507 (2010).
159. Zhang, X. *et al.* Salidroside: A review of its recent advances in synthetic pathways and pharmacological properties. *Chemico-Biological Interactions* **339**, 109268 (2021).
160. Zhong, Z. *et al.* Pharmacological activities, mechanisms of action, and safety of salidroside in the central nervous system. *DDDT Volume* **12**, 1479–1489 (2018).
161. Pegg, A. E. The function of spermine: Function of Spermine. *IUBMB Life* **66**, 8–18 (2014).

162. Xu, T.-T. *et al.* Spermidine and spermine delay brain aging by inducing autophagy in SAMP8 mice. *Aging* **12**, 6401–6414 (2020).
163. Park, H. J. *et al.* Tamarixetin Exhibits Anti-inflammatory Activity and Prevents Bacterial Sepsis by Increasing IL-10 Production. *J. Nat. Prod.* **81**, 1435–1443 (2018).
164. Song, W. *et al.* Tamarixetin Attenuated the Virulence of *Staphylococcus aureus* by Directly Targeting Caseinolytic Protease P. *J. Nat. Prod.* **85**, 1936–1944 (2022).
165. Xu, J. *et al.* The Pro-Apoptotic Activity of Tamarixetin on Liver Cancer Cells Via Regulation Mitochondrial Apoptotic Pathway. *Appl Biochem Biotechnol* **189**, 647–660 (2019).
166. Mo, X. *et al.* Structure and anticancer activities of four Cu( II ) complexes bearing tropolone. *Metallomics* **11**, 1952–1964 (2019).
167. Nakano, K. *et al.* Discovery and characterization of natural tropolones as inhibitors of the antibacterial target CapF from *Staphylococcus aureus*. *Sci Rep* **5**, 15337 (2015).
168. Jin, H.-G., Kim, A. R., Ko, H. J., Lee, S. K. & Woo, E.-R. Three New Lignan Glycosides with IL-6 Inhibitory Activity from *Akebia quinata*. *Chem. Pharm. Bull.* **62**, 288–293 (2014).
169. Jung, H. A. *et al.* Selective Cholinesterase Inhibitory Activities of a New Monoterpene Diglycoside and Other Constituents from *Nelumbo nucifera* Stamens. *Biological & Pharmaceutical Bulletin* **33**, 267–272 (2010).
170. Zhao, C. *et al.* Copacamphane, Picrotoxane, and Alloaromadendrane Sesquiterpene Glycosides and Phenolic Glycosides from *Dendrobium moniliforme*. *J. Nat. Prod.* **66**, 1140–1143 (2003).
171. Seya, K. *et al.* Endothelium-dependent vasodilatory effect of vitisin C, a novel plant oligostilbene from *Vitis* plants (Vitaceae), in rabbit aorta. *Clinical Science* **105**, 73–79 (2003).
172. Sumner, L. W. *et al.* Proposed minimum reporting standards for chemical analysis: Chemical Analysis Working Group (CAWG) Metabolomics Standards Initiative (MSI). *Metabolomics* **3**, 211–221 (2007).
